# Supplementary material for: Association of Social and Behavioral Risk Factors With Mortality Among US Veterans With COVID-19
Source: PubMed Central journal article supplement (PMC8190626; doi:10.1001/jamanetworkopen.2021.13031), 2021-06-09
Supplement: jamanetwopen-e2113031-s001.pdf [file jamanetwopen-e2113031-s001.pdf]

## Supplementary Online Content

Kelly JD, Bravata DM, Bent S, et al. Association of social and behavioral risk factors with mortality among US veterans with COVID-19. *JAMA Netw Open*. 2021;4(6):e2113031. doi:10.1001/jamanetworkopen.2021.13031

**eTable 1.** Codes Used to Define the Variables for the Social and Behavioral Risk Factors

**eTable 2.** Iterative Prediction Models to Assess Social and Behavioral Risk With 30-Day Mortality Among Veterans With COVID-19

**eTable 3.** Social and Behavioral Risk With COVID-19 Mortality, by Race

**eTable 4.** Social and Behavioral Risk With Mortality, by Ethnicity

**eTable 5.** Assessment of Interaction Between Social and Behavioral Risk and Race/Ethnicity

This supplementary material has been provided by the authors to give readers additional information about their work.

**eTable 1.** Codes Used to Define the Variables for the Social and Behavioral Risk Factors

| Domain                         | Definitions                                                                                                                                                                                                                                                                                                                                                                                                                                                                                                                                                                                                                                                                   |
|--------------------------------|-------------------------------------------------------------------------------------------------------------------------------------------------------------------------------------------------------------------------------------------------------------------------------------------------------------------------------------------------------------------------------------------------------------------------------------------------------------------------------------------------------------------------------------------------------------------------------------------------------------------------------------------------------------------------------|
| <b>Social Risk Factors</b>     |                                                                                                                                                                                                                                                                                                                                                                                                                                                                                                                                                                                                                                                                               |
| Financial hardship             | <ul style="list-style-type: none"> <li>• ICD-10 codes, at least one code in the past two years               <ul style="list-style-type: none"> <li>○ <a href="#">Z59.4</a> Lack of adequate food and safe drinking water</li> <li>○ <a href="#">Z59.5</a> Extreme poverty</li> <li>○ <a href="#">Z59.6</a> Low income</li> <li>○ <a href="#">Z59.7</a> Insufficient social insurance and welfare support</li> </ul> </li> </ul> <p>OR</p> <ul style="list-style-type: none"> <li>• VA priority Score 5: annual income level that's below the VA adjusted income limits-based zip code, eligible to receive VA pension benefits or eligible for Medicaid programs.</li> </ul> |
| Housing problems               | <ul style="list-style-type: none"> <li>• ICD-10 codes, at least one code in past two years               <ul style="list-style-type: none"> <li>○ <a href="#">Z59.0</a> Homelessness</li> <li>○ <a href="#">Z59.1</a> Inadequate housing</li> <li>○ <a href="#">Z59.8</a> Other problems related to housing and economic circumstances</li> <li>○ <a href="#">Z59.9</a> Problem related to housing and economic circumstances, unspecified</li> </ul> </li> </ul> <p>OR</p> <ul style="list-style-type: none"> <li>• Clinic Stop codes, at least one code in past two years: 507, 522, 528, 529, 530</li> </ul>                                                               |
| <b>Behavioral Risk Factors</b> |                                                                                                                                                                                                                                                                                                                                                                                                                                                                                                                                                                                                                                                                               |
| Tobacco abuse                  | <ul style="list-style-type: none"> <li>• ICD-10 codes, at least one code in the past year               <ul style="list-style-type: none"> <li>○ F17.200 Nicotine dependence, unspecified, uncomplicated</li> <li>○ F17.210 Nicotine dependence, cigarettes, uncomplicated</li> <li>○ F17.290 Nicotine dependence, other tobacco product, uncomplicated</li> <li>○ Z72.0 Tobacco use</li> </ul> </li> </ul> <p>OR</p> <ul style="list-style-type: none"> <li>• CPT code, at least one code in the past year               <ul style="list-style-type: none"> <li>○ 99406 Smoking and tobacco cessation counseling visit, 3 to 10 minutes</li> </ul> </li> </ul>               |

|             |                                                                                                                                                                                                                                                                                                                                                                                                                                                                                                                                                                                                                                                                                                                                                                                                                                                                                                                                                                                                                                                                                                                                                                                                                                                                                                                                                                                                                                                                                                                                                                                                                                                                                                                                                                                                                |
|-------------|----------------------------------------------------------------------------------------------------------------------------------------------------------------------------------------------------------------------------------------------------------------------------------------------------------------------------------------------------------------------------------------------------------------------------------------------------------------------------------------------------------------------------------------------------------------------------------------------------------------------------------------------------------------------------------------------------------------------------------------------------------------------------------------------------------------------------------------------------------------------------------------------------------------------------------------------------------------------------------------------------------------------------------------------------------------------------------------------------------------------------------------------------------------------------------------------------------------------------------------------------------------------------------------------------------------------------------------------------------------------------------------------------------------------------------------------------------------------------------------------------------------------------------------------------------------------------------------------------------------------------------------------------------------------------------------------------------------------------------------------------------------------------------------------------------------|
|             | <ul style="list-style-type: none"> <li>○ 99407 Smoking and tobacco cessation counseling visit, greater than 10 minutes</li> <li>○ S9075 Smoking cessation treatment</li> <li>○ S9453 Smoking cessation classes, non-physician provider</li> <li>○ G0436 Smoking and tobacco cessation counseling for asymptomatic patient, 3 to 10 minutes</li> <li>○ G0437 Smoking and tobacco cessation counseling for asymptomatic patient, greater than 10 minutes</li> </ul> <p>OR</p> <ul style="list-style-type: none"> <li>● Clinic stop code, at least one code in the past year: 707, 708</li> </ul> <p>OR</p> <ul style="list-style-type: none"> <li>● Most recent health factor within past year indicates current smoker. Table of smoking-related health factors adapted from table available at: <a href="https://medicine.yale.edu/intmed/vacs/">https://medicine.yale.edu/intmed/vacs/</a></li> <li>●</li> </ul>                                                                                                                                                                                                                                                                                                                                                                                                                                                                                                                                                                                                                                                                                                                                                                                                                                                                                              |
| Alcohol use | <ul style="list-style-type: none"> <li>● Audit C Score <math>\geq 3</math> for female, <math>\geq 4</math> for male</li> </ul> <p>OR</p> <ul style="list-style-type: none"> <li>● One inpatient ICD10 code or two outpatient ICD10 codes within the past two years: <ul style="list-style-type: none"> <li>○ <a href="#">F10</a>: All Alcohol related disorders</li> <li>○ <a href="#">K70</a> Alcoholic liver disease <ul style="list-style-type: none"> <li>▪ <a href="#">K70.0</a> Alcoholic fatty liver</li> <li>▪ <a href="#">K70.1</a> Alcoholic hepatitis <ul style="list-style-type: none"> <li>● <a href="#">K70.10</a> ..... without ascites</li> <li>● <a href="#">K70.11</a> ..... with ascites</li> </ul> </li> <li>▪ <a href="#">K70.2</a> Alcoholic fibrosis and sclerosis of liver</li> <li>▪ <a href="#">K70.3</a> Alcoholic cirrhosis of liver <ul style="list-style-type: none"> <li>● <a href="#">K70.30</a> ..... without ascites</li> <li>● <a href="#">K70.31</a> ..... with ascites</li> </ul> </li> <li>▪ <a href="#">K70.4</a> Alcoholic hepatic failure <ul style="list-style-type: none"> <li>● <a href="#">K70.40</a> ..... without coma</li> <li>● <a href="#">K70.41</a> ..... with coma</li> </ul> </li> <li>▪ <a href="#">K70.9</a> Alcoholic liver disease, unspecified</li> </ul> </li> <li>○ <a href="#">G31.2</a> Degeneration of nervous system due to alcohol</li> <li>○ <a href="#">G62.1</a>, Alcoholic Polyneuropathy</li> <li>○ <a href="#">I42.6</a> Alcoholic Cardiomyopathy</li> <li>○ <a href="#">K29.2</a> Alcoholic Gastritis</li> <li>○ <a href="#">O35.4</a> All maternal care for (suspected) damage to fetus from alcohol</li> <li>○ <a href="#">O99.31</a> All alcohol use complicating pregnancy, childbirth, and the puerperium</li> </ul> </li> </ul> |

|               |                                                                                                                                                                                                                                                                                                                                                                                                                                                                                                                                                                                                                                                                                                                                                                                                                                                                                                                                                                                                                                                                                                                                                                                                                                                                                                                                                                                                                                                                                                                                           |
|---------------|-------------------------------------------------------------------------------------------------------------------------------------------------------------------------------------------------------------------------------------------------------------------------------------------------------------------------------------------------------------------------------------------------------------------------------------------------------------------------------------------------------------------------------------------------------------------------------------------------------------------------------------------------------------------------------------------------------------------------------------------------------------------------------------------------------------------------------------------------------------------------------------------------------------------------------------------------------------------------------------------------------------------------------------------------------------------------------------------------------------------------------------------------------------------------------------------------------------------------------------------------------------------------------------------------------------------------------------------------------------------------------------------------------------------------------------------------------------------------------------------------------------------------------------------|
| Substance use | <ul style="list-style-type: none"> <li>• Any single ICD10 code associated with drug use in an inpatient setting or two ICD10 codes associated with drug use in an outpatient setting within 2 years. <ul style="list-style-type: none"> <li>○ <a href="#">F11</a> Opioid related disorders</li> <li>○ <a href="#">F12</a> Cannabis related disorders</li> <li>○ <a href="#">F13</a> Sedative, hypnotic, or anxiolytic related disorders</li> <li>○ <a href="#">F14</a> Cocaine related disorders</li> <li>○ <a href="#">F15</a> Other stimulant related disorders</li> <li>○ <a href="#">F16</a> Hallucinogen related disorders</li> <li>○ <a href="#">F17</a> Nicotine dependence</li> <li>○ <a href="#">F18</a> Inhalant related disorders</li> <li>○ <a href="#">F19</a> Other psychoactive substance related disorders</li> <li>○ O35.5 Maternal care for (suspected) damage to fetus by drugs</li> <li>○ O99.32 Drug use complicating pregnancy, childbirth, and the puerperium</li> <li>○ T40 Poisoning by, adverse effect of and underdosing of narcotics and psychodysleptics</li> <li>○ T41.0 Poisoning by, adverse effect of and underdosing of inhaled anesthetics</li> <li>○ T42.6 Poisoning by, adverse effect of and underdosing of other antiepileptic and sedative-hypnotic drugs</li> <li>○ T42.7 Poisoning by, adverse effect of and underdosing of unspecified antiepileptic, and sedative-hypnotic drugs</li> <li>○ T43.6 Poisoning by, adverse effect of, and underdosing of psychostimulants</li> </ul> </li> </ul> |
|---------------|-------------------------------------------------------------------------------------------------------------------------------------------------------------------------------------------------------------------------------------------------------------------------------------------------------------------------------------------------------------------------------------------------------------------------------------------------------------------------------------------------------------------------------------------------------------------------------------------------------------------------------------------------------------------------------------------------------------------------------------------------------------------------------------------------------------------------------------------------------------------------------------------------------------------------------------------------------------------------------------------------------------------------------------------------------------------------------------------------------------------------------------------------------------------------------------------------------------------------------------------------------------------------------------------------------------------------------------------------------------------------------------------------------------------------------------------------------------------------------------------------------------------------------------------|

**eTable 2.** Iterative Prediction Models to Assess Social and Behavioral Risk With 30-Day Mortality Among Veterans With COVID-19

|                     | Crude OR (95% CI) | p      | OR adjusted for age (95% CI) | p     | OR adjusted for demographics, Charlson comorbidity index, location, month, and all social and behavioral risk factors (95% CI) | p    |
|---------------------|-------------------|--------|------------------------------|-------|--------------------------------------------------------------------------------------------------------------------------------|------|
| Housing problems    | 0.86 (0.71, 1.04) | 0.13   | 1.24 (1.01, 1.51)            | 0.04  | 0.98 (0.79, 1.22)                                                                                                              | 0.88 |
| Financial hardship  | 1.86 (1.63, 2.12) | < .001 | 1.18 (1.025, 1.36)           | 0.02  | 1.11 (0.96, 1.29)                                                                                                              | 0.17 |
| Current tobacco use | 0.63 (0.53, 0.75) | < .001 | 0.92 (0.77, 1.1)             | 0.37  | 0.86 (0.70, 1.07)                                                                                                              | 0.17 |
| Alcohol use         | 0.53 (0.44, 0.63) | < .001 | 0.76 (0.63, 0.91)            | 0.004 | 0.79 (0.65, 0.96)                                                                                                              | 0.02 |
| Substance use       | 0.83 (0.69, 0.99) | 0.04   | 1.05 (0.87, 1.27)            | 0.61  | 0.92 (0.73, 1.16)                                                                                                              | 0.48 |

**eTable 3.** Social and Behavioral Risk With COVID-19 Mortality, by Race

|                    | All<br>(n=27,640) | White<br>(n=15,113) | Black<br>(n=9,745) | Asian<br>(n=328) | American<br>Indian or<br>Alaska Native<br>(n=283) | Native Hawaiian<br>or other Pacific<br>Islander (n=316) | Unknown<br>(n=1,855) | p          |
|--------------------|-------------------|---------------------|--------------------|------------------|---------------------------------------------------|---------------------------------------------------------|----------------------|------------|
| Housing problems   | 3090<br>(11.2%)   | 1234<br>(8.2%)      | 1583<br>(16.2%)    | 27<br>(8.2%)     | 46 (16.3%)                                        | 30 (9.5%)                                               | 170<br>(9.2%)        | <<br>0.001 |
| Financial hardship | 4450<br>(16.1%)   | 2403<br>(15.9%)     | 1667<br>(17.1%)    | 35<br>(10.7%)    | 52 (18.4%)                                        | 44 (13.9%)                                              | 249<br>(13.4%)       | <<br>0.001 |
| Current smoker     | 4910<br>(17.8%)   | 2665<br>(17.6%)     | 1830<br>(18.8%)    | 60<br>(18.3%)    | 64 (22.6%)                                        | 53 (16.8%)                                              | 238<br>(12.8%)       | <<br>0.001 |
| Alcohol use        | 5358<br>(19.4%)   | 2957<br>(19.6%)     | 1841<br>(18.9%)    | 74<br>(22.6%)    | 70 (24.7%)                                        | 49 (15.5%)                                              | 367<br>(19.8%)       | 0.03       |
| Substance use      | 3569<br>(12.9%)   | 1793<br>(11.9%)     | 1482<br>(15.2%)    | 30<br>(9.1%)     | 50 (17.7%)                                        | 41 (13%)                                                | 173<br>(9.3%)        | <<br>0.001 |

**eTable 4.** Social and Behavioral Risk With Mortality, by Ethnicity

|                    | All          | Hispanic    | Not Hispanic | p       |
|--------------------|--------------|-------------|--------------|---------|
| Housing problems   | 3090 (11.2%) | 383 (9.8%)  | 2707 (11.4%) | 0.004   |
| Financial hardship | 4450 (16.1%) | 540 (13.9%) | 3910 (16.5%) | < 0.001 |
| Current smoker     | 4910 (17.8%) | 539 (13.8%) | 4371 (18.4%) | < 0.001 |
| Alcohol use        | 5358 (19.4%) | 838 (21.5%) | 4520 (19%)   | < 0.001 |
| Substance use      | 3569 (12.9%) | 362 (9.3%)  | 3207 (13.5%) | < 0.001 |

**eTable 5.** Assessment of Interaction Between Social and Behavioral Risk and Race/Ethnicity

|                                                          | Housing problems    | p    | Financial hardship | p    | Current smoker       | p    | Alcohol use          | p    | Substance use        | p    |
|----------------------------------------------------------|---------------------|------|--------------------|------|----------------------|------|----------------------|------|----------------------|------|
| American Indian or Alaska Native and risk factor present | 2.78<br>(0.76, 8.9) | 0.10 | 0.52 (0.13, 1.67)  | 0.3  | 0.61<br>(0.09, 2.45) | 0.54 | 1.14<br>(0.16, 4.68) | 0.87 | 2.44<br>(0.65, 7.98) | 0.16 |
| Asian and risk factor present                            | **-                 | -    | 0.38 (0.02, 2.37)  | 0.39 | -                    | -    | 0.93<br>(0.05, 5.47) | 0.94 | -                    | -    |

\* Model adjusted for age, sex, race, social and behavioral risk, Charlson comorbidity score, and interaction between race and risk covariates.

\*\* Interaction between Asian race and housing problems, tobacco use, and Substance abuse was not assessed due to no deaths among Asian patients with these risk variables.
